# Supplementary material for: La(OH)3 nanosheet-supported CoPt nanoparticles: a highly efficient and magnetically recyclable catalyst for hydrogen production from hydrazine in aqueous solution
Source: Royal Society of Chemistry journal article supplement (doi:10.1039/c9ta01066a), 2019-01-01
Supplement: c9ta01066a1.pdf [file c9ta01066a1.pdf]

## Supporting information

### **La(OH)<sub>3</sub> nanosheet supported CoPt nanoparticles: Highly efficient and magnetically recyclable catalyst for hydrogen production from hydrous hydrazine**

*Kun Wang,<sup>a</sup> Qilu Yao,<sup>a</sup> Shaojun Qing<sup>b</sup> and Zhang-Hui Lu<sup>\*a</sup>*

<sup>a</sup>Institute of Advanced Materials, College of Chemistry and Chemical Engineering, Jiangxi Normal University, Nanchang, 330022, China; <sup>b</sup>Institute of Coal Chemistry, Chinese Academy of Sciences, Taiyuan, 030000, China

*\*Corresponding author: E-mail: luzh@jxnu.edu.cn*

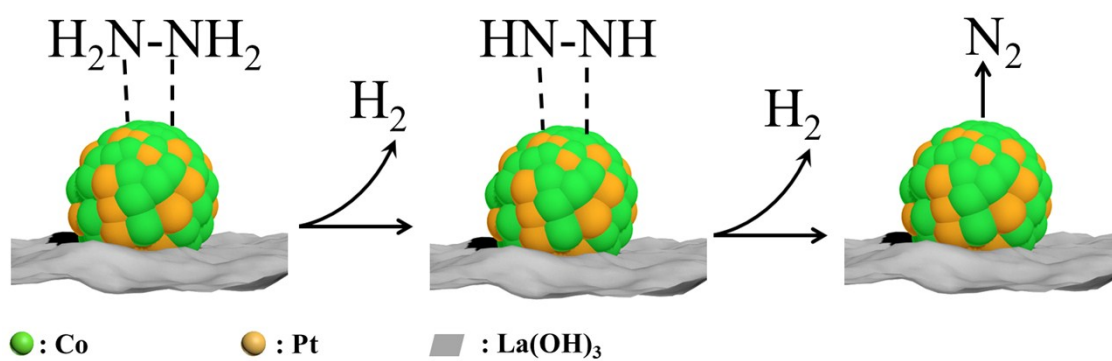

**Scheme S1.** The mechanism of  $\text{N}_2\text{H}_4$  decomposition on CoPt NPs surface.

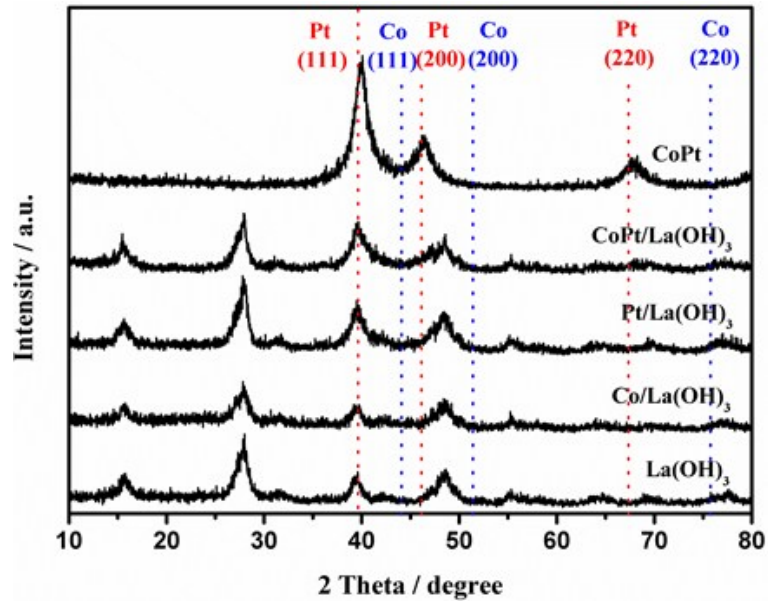

**Fig. S1** Powder XRD patterns of the as-synthesized La(OH)<sub>3</sub>, Co/La(OH)<sub>3</sub>, Pt/La(OH)<sub>3</sub>, CoPt/La(OH)<sub>3</sub>, and free CoPt NPs

As shown in Fig. S1, four obvious characterized peaks located at 15.6°, 27.9°, 39.5° and 48.5° are observed in CoPt/La(OH)<sub>3</sub>, which are assigned to hexagonal La(OH)<sub>3</sub> (PDF# 36-1481). No obvious peak belongs to CoPt NPs appears in CoPt/La(OH)<sub>3</sub>, which can be explained as good dispersion of the ultrafine CoPt NPs on La(OH)<sub>3</sub> surface and/or superposition of CoPt and La(OH)<sub>3</sub> peaks. It is noted that the peak located at 39.5° is obviously enhanced in CoPt/La(OH)<sub>3</sub> and Pt/La(OH)<sub>3</sub> as compared to that of pure La(OH)<sub>3</sub> owing to the superposition of Pt (111) and La(OH)<sub>3</sub> peaks. To eliminate the disturbance of La(OH)<sub>3</sub>, pure CoPt NPs were prepared for characterization. The XRD pattern of free CoPt NPs has a crystalline peak of CoPt alloy located at 39.9°, which is between the characteristic peaks of cubic Pt (111) plane (PDF# 04-0802) and cubic Co (111) plane (PDF# 15-0806).

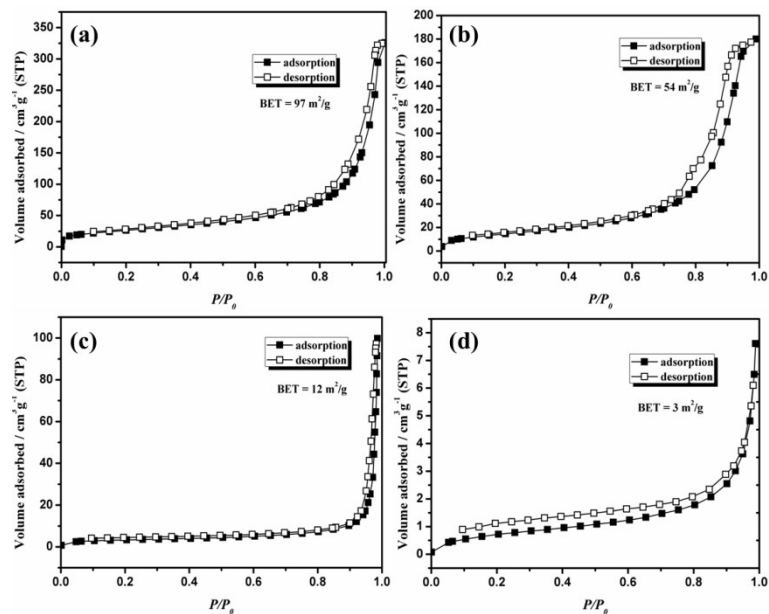

**Fig. S2** Nitrogen adsorption-desorption isotherms of the (a) nanosheet-, (b) nanosphere-, (c) nanorod-, (d) nanobelt-like La(OH)<sub>3</sub>.

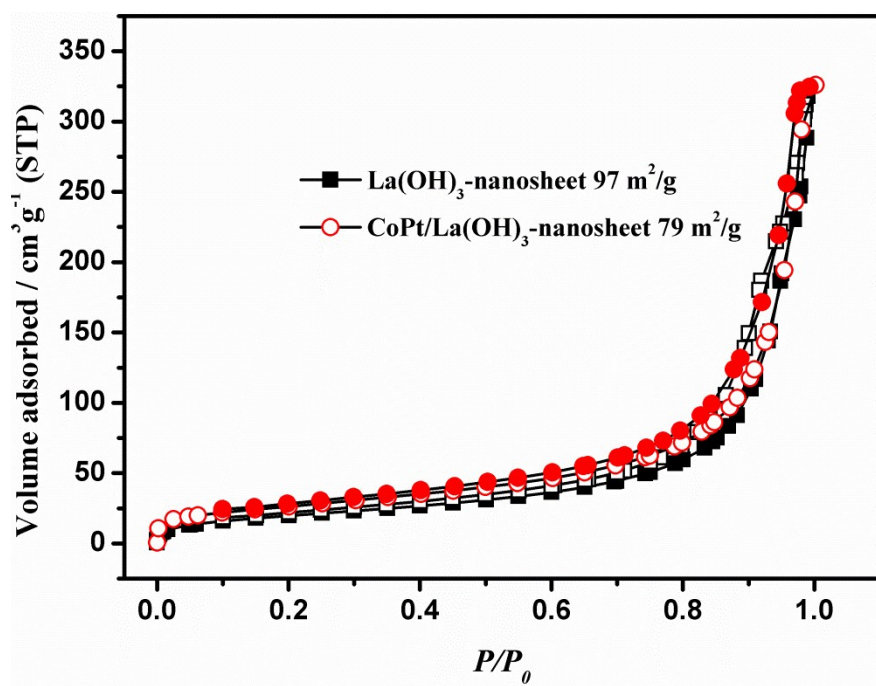

**Fig. S3** Nitrogen adsorption-desorption isotherms of the CoPt/La(OH)<sub>3</sub>-nanosheet and La(OH)<sub>3</sub>-nanosheet.

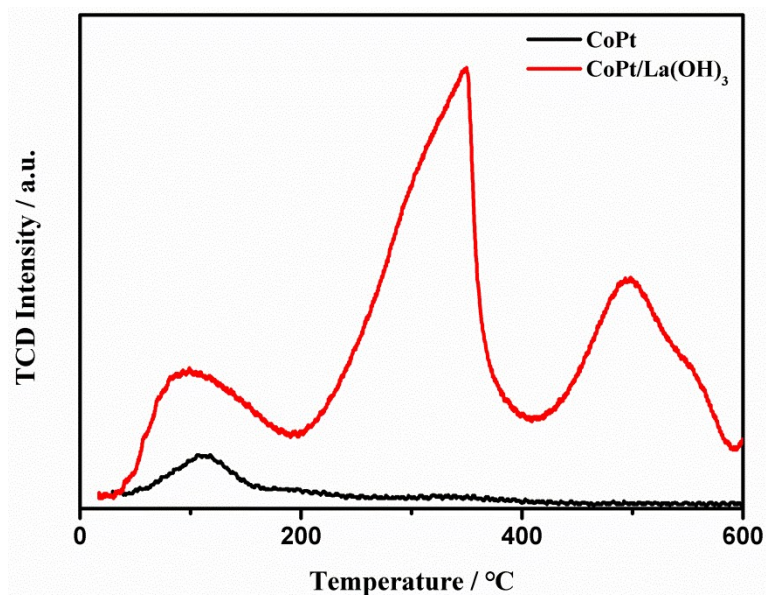

**Fig. S4** CO<sub>2</sub>-TPD mass spectra of the pure CoPt NPs and CoPt/La(OH)<sub>3</sub>.

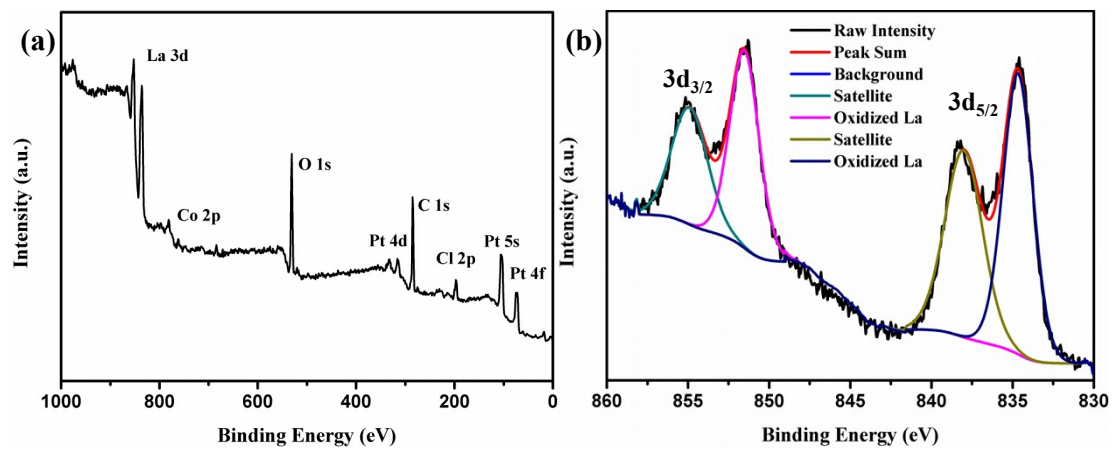

**Fig. S5** (a) The survey XPS spectrum and (b) XPS spectrum of La 3d of CoPt/La(OH)<sub>3</sub>.

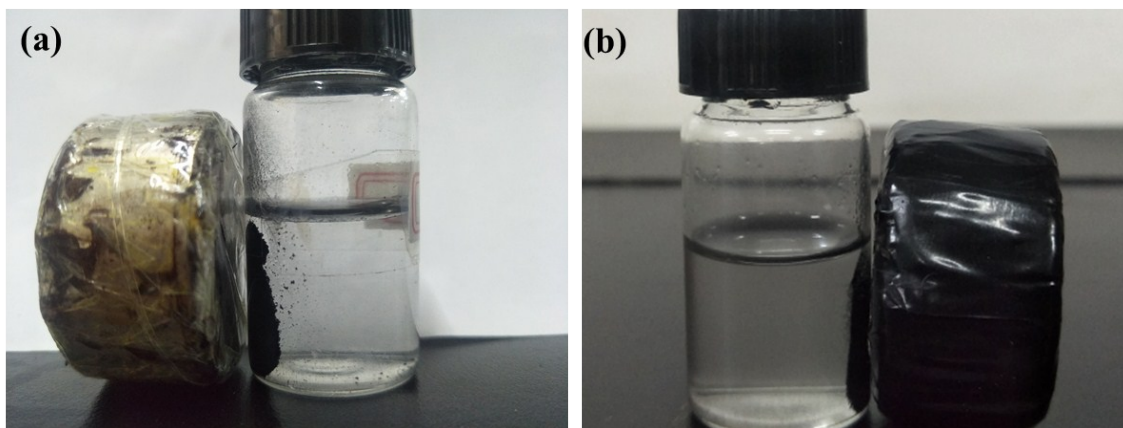

**Fig. S6** Photograph of the (a) CoPt/La(OH)<sub>3</sub> and (b) after five recycle tests CoPt/La(OH)<sub>3</sub> after the magnetic separation.



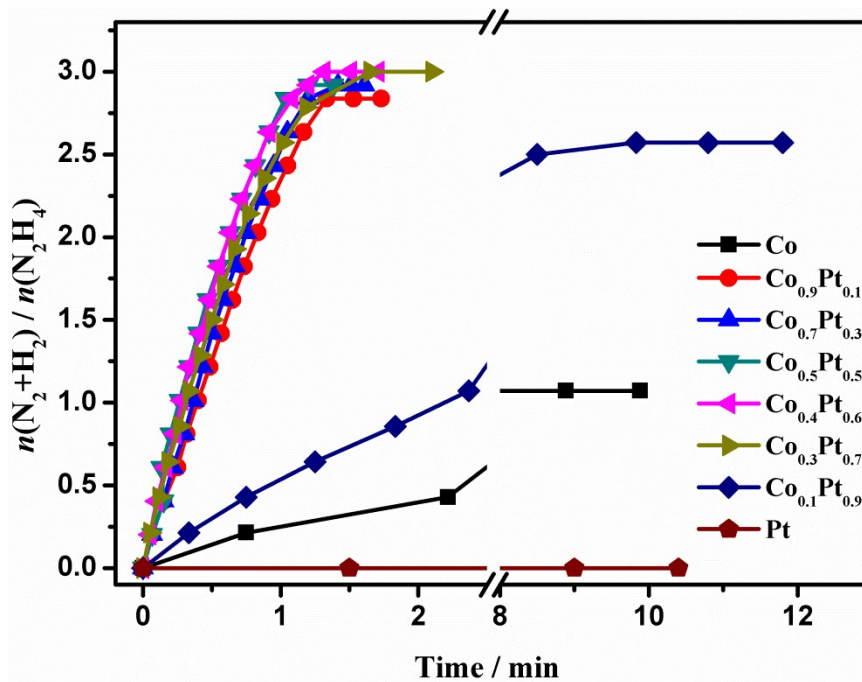

**Fig. S7** Time course plots for decomposition of  $\text{N}_2\text{H}_4$  (400 mM, 5 mL) over  $\text{CoPt/La(OH)}_3$  with different molar contents of Pt in the presence of  $\text{NaOH}$  (3.5 M) at 323 K ( $n_{\text{CoPt}}/n_{\text{N}_2\text{H}_4 \cdot \text{H}_2\text{O}} = 0.05$ ).

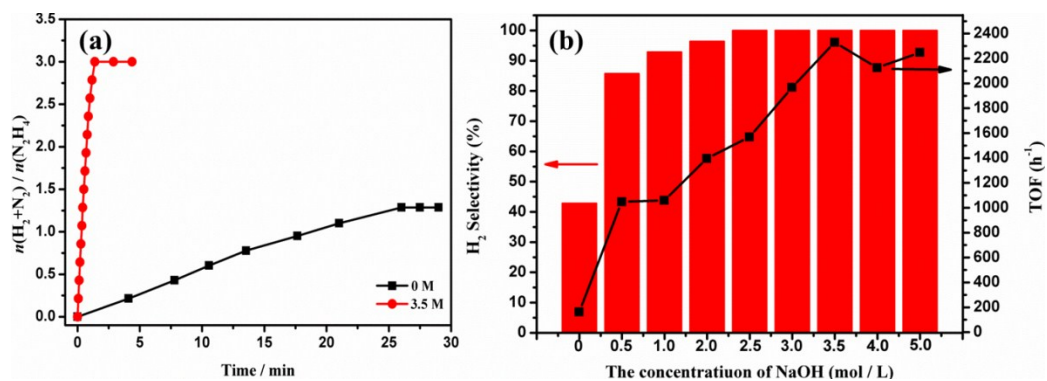

**Fig. S8** (a) Time course plots and (b) NaOH dependence of  $\text{H}_2$  selectivity and the corresponding TOF values for dehydrogenation of  $\text{N}_2\text{H}_4$  (400 mM, 5 mL) over  $\text{CoPt}/\text{La}(\text{OH})_3$  with different amounts of NaOH at 323 K ( $n_{\text{CoPt}}/n_{\text{N}_2\text{H}_4 \cdot \text{H}_2\text{O}} = 0.05$ ).

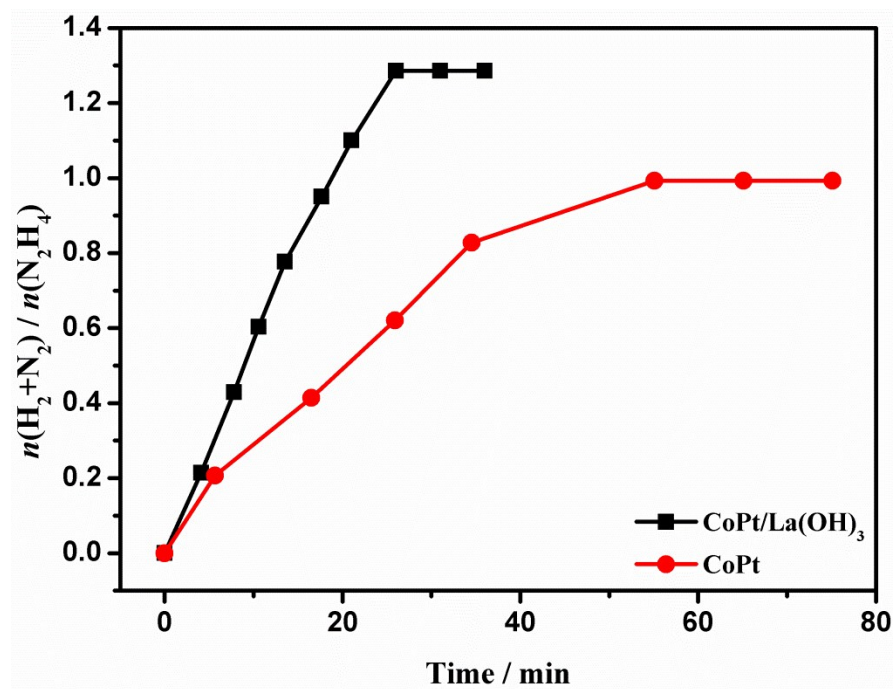

**Fig. S9** Time course plots for decomposition of  $\text{N}_2\text{H}_4$  (400 mM, 5 mL) over CoPt NPs and CoPt/La(OH)<sub>3</sub> without NaOH at 323 K ( $n_{\text{CoPt}}/n_{\text{N}_2\text{H}_4 \cdot \text{H}_2\text{O}} = 0.05$ ).

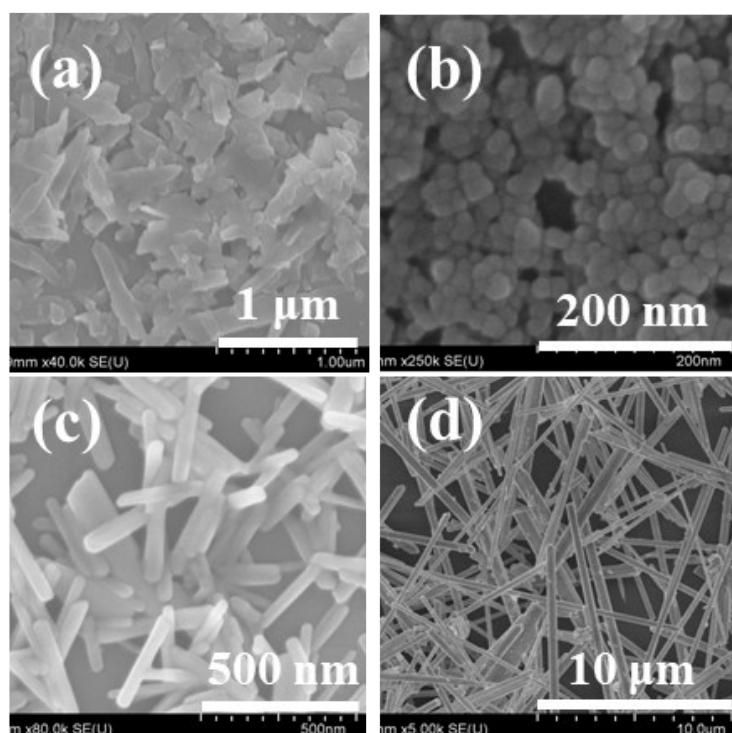

**Fig. S10** Typical SEM images of the as-synthesized (a) nanosheet-, (b) nanosphere-, (c) nanorod-, (d) nanobelt-like La(OH)<sub>3</sub>.

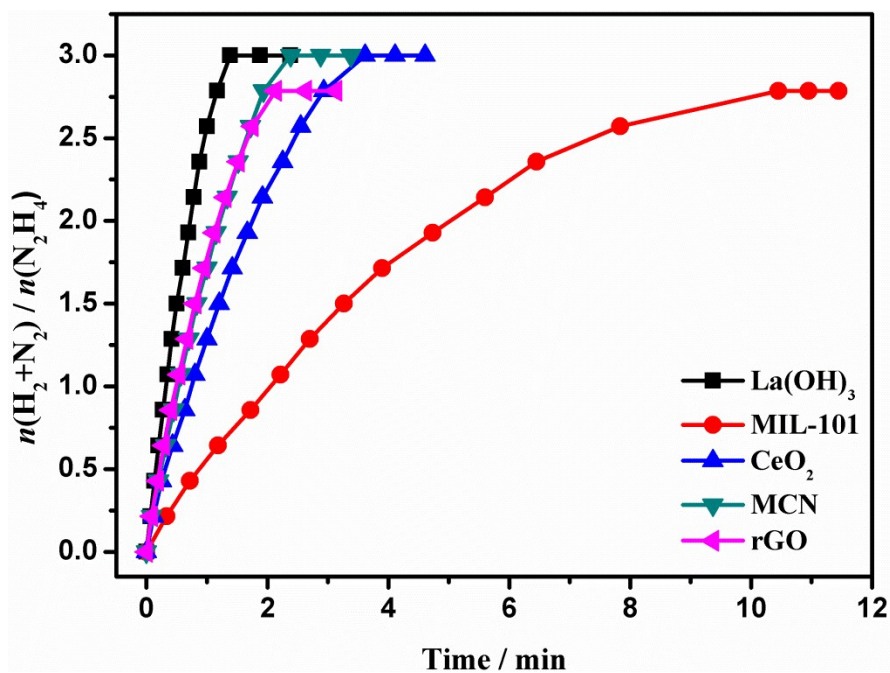

**Fig. S11** Time course plots for decomposition of  $\text{N}_2\text{H}_4$  (400 mM, 5 mL) over CoPt supported by different supports in the presence of NaOH (3.5 M) at 323 K ( $n_{\text{CoPt}}/n_{\text{N}_2\text{H}_4 \cdot \text{H}_2\text{O}} = 0.05$ ).

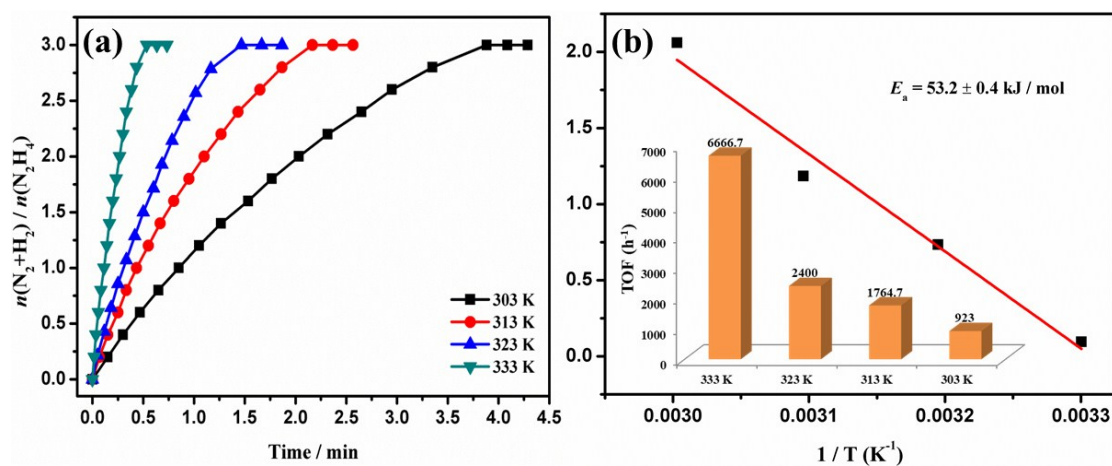

**Fig. S12** (a) Time course plots for decomposition of  $N_2H_4$  (400 mM, 5 mL) over NiPt/La(OH)<sub>3</sub> in the presence of NaOH (3.5 M) at different temperatures ( $n_{NiPt}/n_{N_2H_4 \cdot H_2O} = 0.05$ ); (b) The corresponding Arrhenius plot.

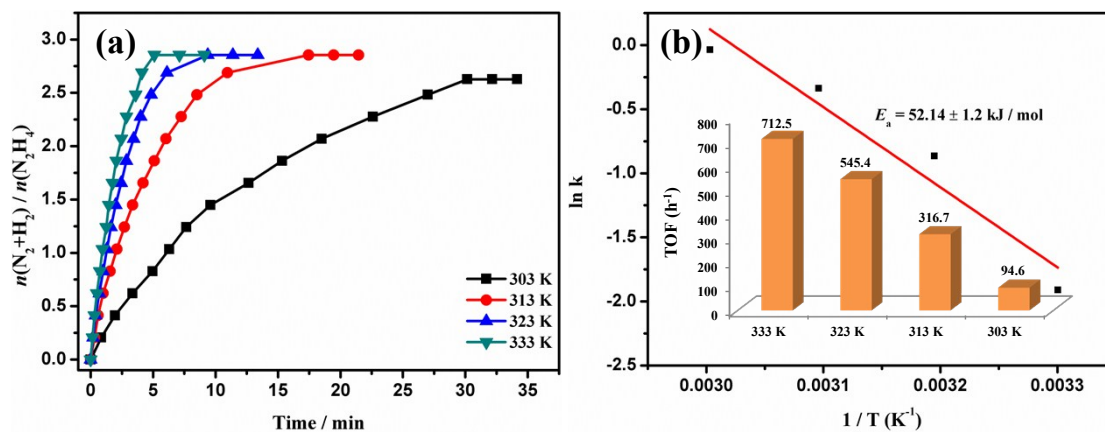

**Fig. S13** (a) Time course plots for decomposition of  $N_2H_4$  (400 mM, 5 mL) over pure CoPt NPs in the presence of NaOH (3.5 M) at different temperatures ( $n_{CoPt}/n_{N_2H_4 \cdot H_2O} = 0.05$ ); (b) The corresponding Arrhenius plot.

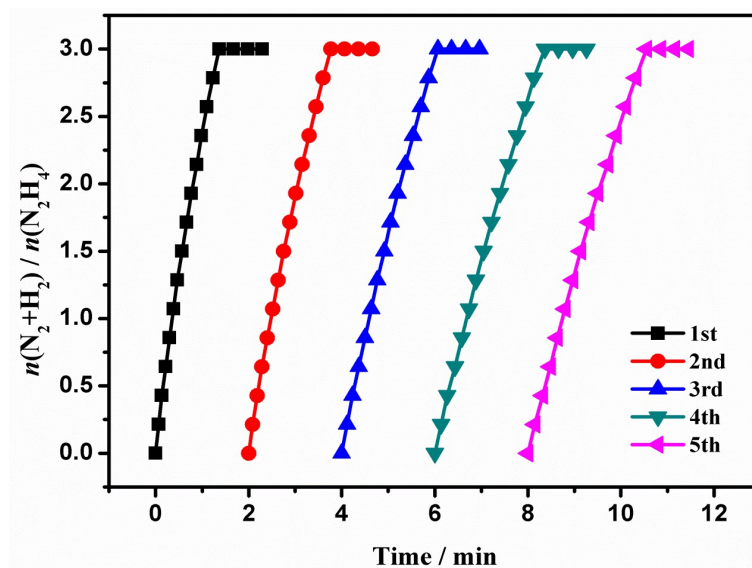

**Fig. S14** Reusability test for decomposition of N<sub>2</sub>H<sub>4</sub> (400 mM, 5 mL) over NiPt/La(OH)<sub>3</sub> with NaOH (3.5 M) at 323 K ( $n_{\text{NiPt}}/n_{\text{N}_2\text{H}_4\cdot\text{H}_2\text{O}} = 0.05$ ).



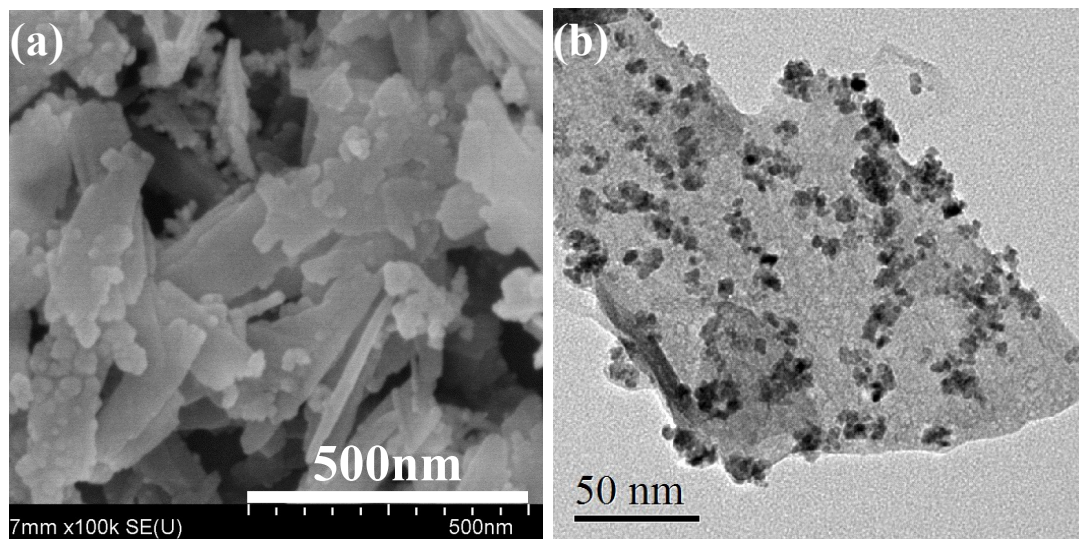

**Fig. S15** Typical SEM (a) and TEM (b) image of the CoPt/La(OH)<sub>3</sub> after five runs.

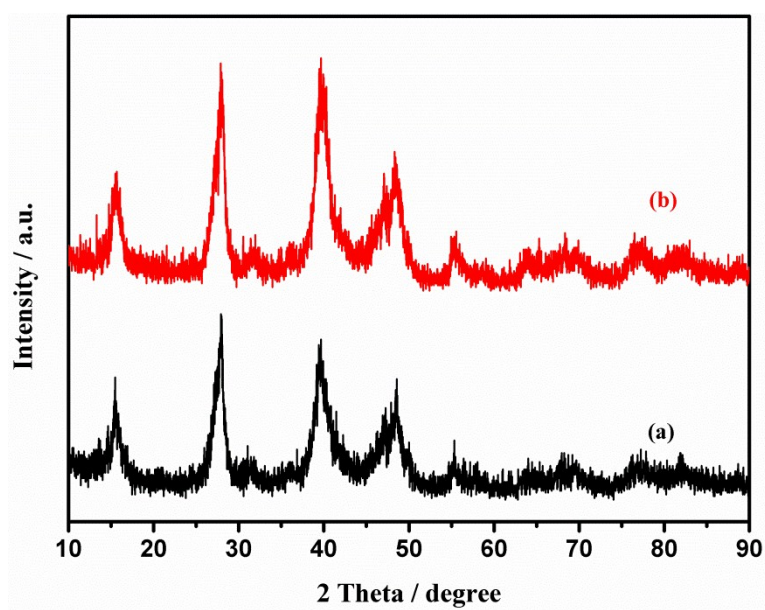

**Fig. S16** Powder XRD patterns of the as-synthesized CoPt/La(OH)<sub>3</sub> catalyst (a) before and (b) after five runs.

**Table S1** ICP-AES results of different catalysts.

| Catalyst                            | Co (wt%) | Pt (wt%) | Co/Pt<br>(molar ratio) |
|-------------------------------------|----------|----------|------------------------|
| Co                                  | 12.47    | -        | -                      |
| Co <sub>0.9</sub> Pt <sub>0.1</sub> | 11.79    | 4.38     | 8.89                   |
| Co <sub>0.7</sub> Pt <sub>0.3</sub> | 8.00     | 11.51    | 2.29                   |
| Co <sub>0.5</sub> Pt <sub>0.5</sub> | 5.73     | 15.62    | 1.02                   |
| Co <sub>0.4</sub> Pt <sub>0.6</sub> | 4.32     | 21.64    | 0.65                   |
| Co <sub>0.3</sub> Pt <sub>0.7</sub> | 3.01     | 23.90    | 0.42                   |
| Co <sub>0.1</sub> Pt <sub>0.9</sub> | 1.02     | 30.55    | 0.11                   |
| Pt                                  | -        | 32.77    | -                      |

**Table S2.** Catalytic activities of different catalysts for the dehydrogenation of hydrous hydrazine.

| <b>Catalyst</b>                                                           | <b>Temp.</b> | <b>Selectivity</b> | <b>TOF</b>              | <b>E<sub>a</sub></b> | <b>Ref.</b> |
|---------------------------------------------------------------------------|--------------|--------------------|-------------------------|----------------------|-------------|
|                                                                           | <b>(K)</b>   | <b>(100%)</b>      | <b>(h<sup>-1</sup>)</b> | <b>(kJ / mol)</b>    |             |
| NiPt/Ce <sub>2</sub> O <sub>3</sub>                                       | 298          | 100                | 28.1                    | 42.3                 | S1          |
| NiPt/MIL-101                                                              | 303          | 100                | 140                     | 48.4                 | S2          |
| NiPt/PDA-rGO                                                              | 303          | 100                | 903                     | 33.39                | S3          |
| NiCo/NiO-CoO <sub>x</sub>                                                 | 295          | 99                 | 5.49                    | 45.2                 | S4          |
| Co <sub>0.65</sub> Pt <sub>0.30</sub> (CeO <sub>x</sub> ) <sub>0.05</sub> | 298          | 72.1               | 194.8                   | -                    | S5          |
| CoIr/γ-Al <sub>2</sub> O <sub>3</sub>                                     | 298          | 100                | 27.76                   | 40.8                 | S6          |
| NiMoB-La(OH) <sub>3</sub>                                                 | 323          | 100                | 13.3                    | 55.1                 | S7          |
| Pt <sub>0.5</sub> Ni <sub>0.5</sub> /NGNs-850                             | 323          | 100                | 2116                    | 32.28                | S8          |
| Ni <sub>84</sub> Pt <sub>16</sub> /graphene                               | 323          | 100                | 415                     | 40.4                 | S9          |
| Ni <sub>3</sub> Pt <sub>7</sub> /graphene                                 | 323          | 100                | 415                     | 49.36                | S10         |
| Rh <sub>4.4</sub> Ni/graphene                                             | 298          | 100                | 28                      | -                    | S11         |
| Pt <sub>60</sub> Ni <sub>40</sub> -CNDs                                   | 323          | 100                | 170                     | 43.9                 | S12         |
| NiIr <sub>0.059</sub> /Al <sub>2</sub> O <sub>3</sub> -HT                 | 303          | 99                 | 12.4                    | 49.3                 | S13         |
| NiPt <sub>0.057</sub> /Al <sub>2</sub> O <sub>3</sub> -HT                 | 303          | 97                 | 16.5                    | 34                   | S14         |
| Ni <sub>1.5</sub> Fe <sub>1.0</sub> /(MgO) <sub>3.5</sub>                 | 299          | 99                 | 11                      | -                    | S15         |

---

|                          |     |     |       |      |           |
|--------------------------|-----|-----|-------|------|-----------|
| PtNi/C                   | 323 | 100 | 210   | 55.3 | S16       |
| NiPt/La(OH) <sub>3</sub> | 303 | 100 | 923   | 53.2 | This work |
| NiPt/La(OH) <sub>3</sub> | 323 | 100 | 2400  | 53.2 | This work |
| CoPt/La(OH) <sub>3</sub> | 303 | 100 | 734.2 | 45.2 | This work |
| CoPt/La(OH) <sub>3</sub> | 323 | 100 | 2400  | 45.2 | This work |

---

## References

- (S1) H. L. Wang, J. M. Yan, Z. L. Wang, O. Song-Il and Q. Jiang, *J. Mater. Chem. A*, 2013, **1**, 14957-14962.
- (S2) Z. J. Zhang, S. L. Zhang, Q. L. Yao, X. S. Chen and Z. H. Lu, *Inorg. Chem.*, 2017, **56**, 11938-11945.
- (S3) F. Z. Song, Q. L. Zhu and Q. Xu, *J. Mater. Chem. A*, 2015, **3**, 23090-23094.
- (S4) D. D. Wu, M. Wen, X. J. Lin, Q. S. Wu, C. Gu and H. X. Chen, *J. Mater. Chem. A*, 2016, **4**, 6595-6602.
- (S5) O. Song-Il, J. M. Yan, H. L. Wang, Z. L. Wang and Q. Jiang, *Int. J. Hydrogen Energy*, 2014, **39**, 3755-3761.
- (S6) N. Firdous, N. K. Janjua, I. Qazi and M. H. Sarwar Wattoo, *Int. J. Hydrogen Energy*, 2016, **4**, 984-955.
- (S7) J. Zhang, Q. Kang, Z. Yang, H. Dai, D. Zhuang and P. Wang, *J. Mater. Chem. A*, 2013, **1**, 11623-11628.
- (S8) A. Kumar, X. C. Yang and Q. Xu, *J. Mater. Chem. A*, 2018, 10.1039/C8TA09003C.
- (S9) Y. S. Du, J. Su, W. Luo and G. Z. Cheng, *ACS Appl. Mater. Interfaces*, 2015, **7**, 1031-1034.
- (S10) N. Cao, L. Yang, C. Du, J. Su, W. Luo and G. Z. Cheng, *J. Mater. Chem. A*, 2014, **2**, 14344-14347.
- (S11) J. Wang, X. B. Zhang, Z. L. Wang, L. M. Wang and Y. Zhang, *Energy Environ. Sci.*, 2012, **5**, 6885-6888.

- (S12) J. K. Sun and Q. Xu, *ChemCatChem*, 2015, **7**, 526-531.
- (S13) L. He, Y. Q. Huang, X. Y. Liu, L. Li, A. Q. Wang, X. D. Wang, Y. C. Mou and T. Zhang, *Appl. Catal. B*, 2014, **147**, 779-788.
- (S14) L. He, Y. Q. Huang, A. Q. Wang, Y. Liu, X. Y. Liu, X. W. Chen, J. J. Delgado, X. D. Wang and T. Zhang, *J. Catal.*, 2013, **298**, 1-9.
- (S15) W. Gao, C. M. Li, H. Chen, M. Wu, S. He, M. Wei, D. G. Evans and X. Duan, *Green Chem.*, 2014, **16**, 1560-1568.
- (S16) S. N. Oliaee, C. L. Zhang, S. Y. Hwang, H. M. Cheung and Z. M. Peng, *J. Phys. Chem. C*, 2016, **120**, 9764-9772.
